# Supplementary material for: Structural Characterization of Heme Environmental Mutants of CgHmuT that Shuttles Heme Molecules to Heme Transporters
Source: MDPI journal article supplement (doi:10.3390/ijms17060829), 2016-05-27
Supplement: s1 [file s1]

# Supplementary Materials: Structural Characterization of Heme Environmental Mutants of CgHmuT that Shuttles Heme Molecules to Heme Transporters

Norifumi Muraki, Chihiro Kitatsuji, Mariko Ogura, Takeshi Uchida, Koichiro Ishimori and Shigetoshi Aono

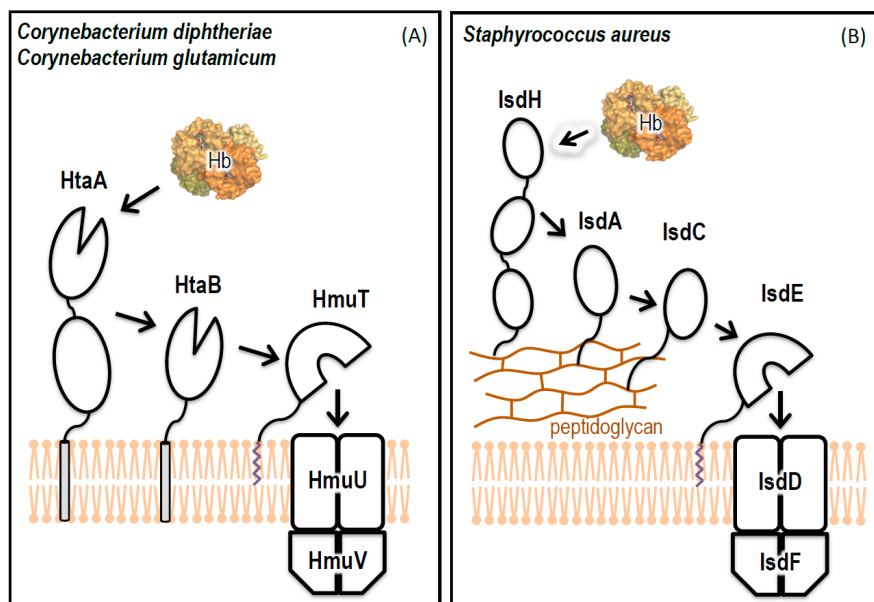

**Figure S1.** Model of heme acquisition system in (A) *Corynebacterium diphtheriae* and *Corynebacterium glutamicum* and (B) *Staphylococcus aureus*.

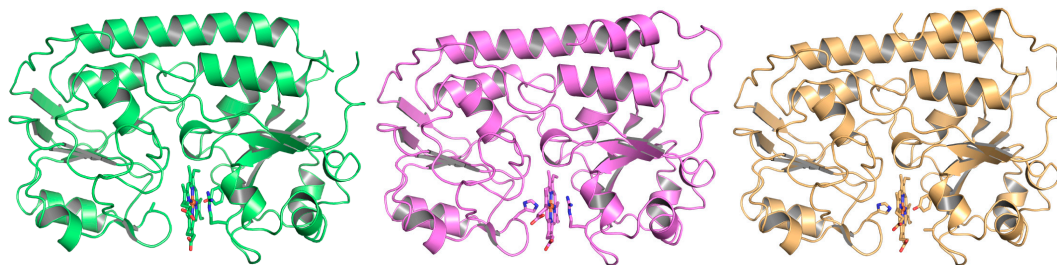

**Figure S2.** Overall structure of (Left) H141A, (Middle) Y240A, and (Right) R242A mutants.
